# Supplementary material for: Substituent-induced electronic localization of nickel phthalocyanine with enhanced electrocatalytic CO2 reduction
Source: Research Square preprint supplement (doi:10.21203/rs.3.rs-138056/v1), 2021-01-16
Supplement: Supplementary file 2 [file a93dd6866eb91af8b0612372.docx]

**Supplementary Information**

**Substituent-induced electronic localization of nickel phthalocyanine with enhanced electrocatalytic CO2 reduction**

Chen *et.al*

**Supplementary Figures**

**
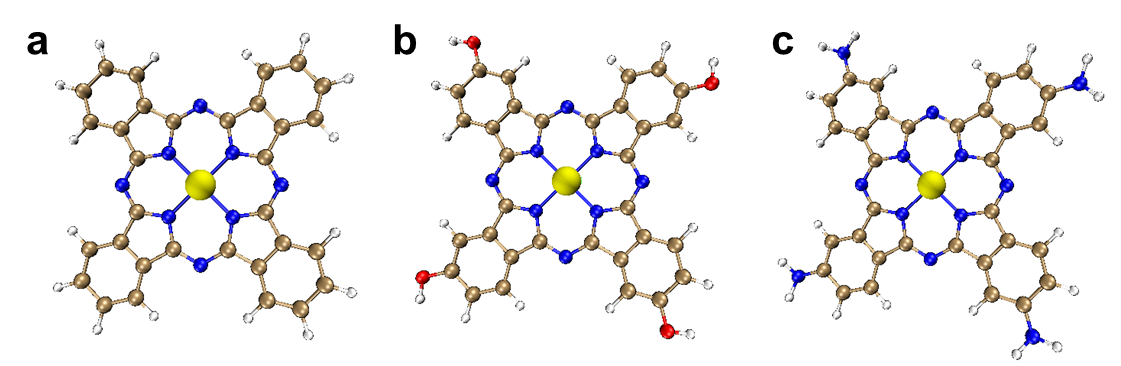
**

**Supplementary Fig. 1 Calculation models**. **a** NiPc. **b** NiTHPc. **c** NiTAPc.

**
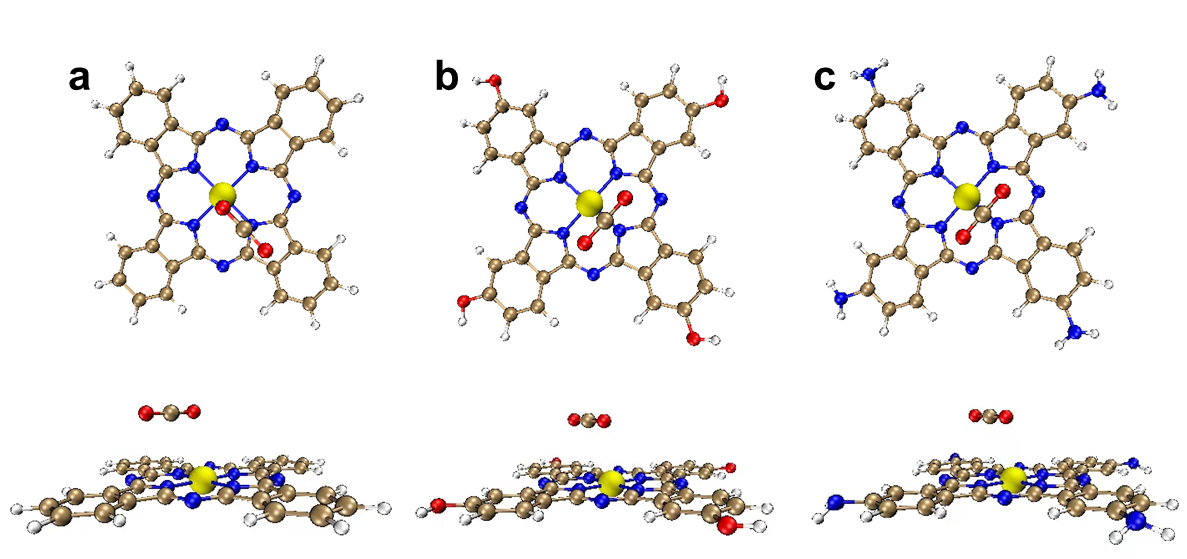
**

**Supplementary Fig. 2 CO2 adsorption configurations**. **a** NiPc. **b** NiTHPc. **c** NiTAPc.


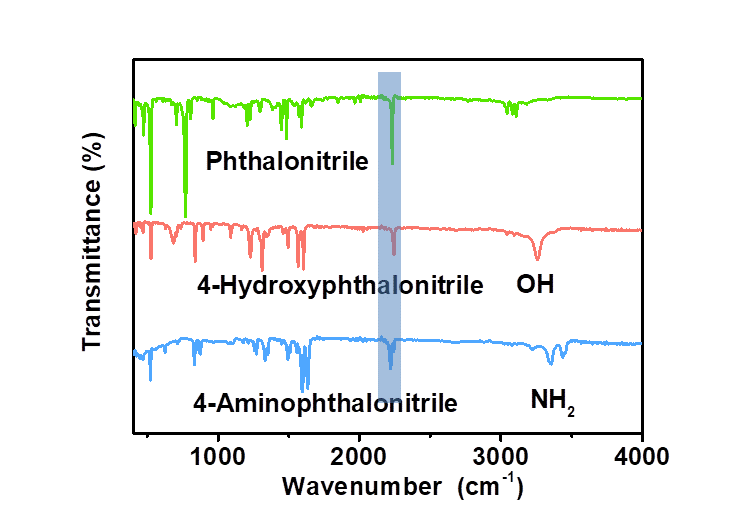


**Supplementary Fig. 3 FTIR spectra.** FTIR spectra of phthalonitrile, 4-Hydroxyphthalonitrile and 4-Aminophthalonitrile.


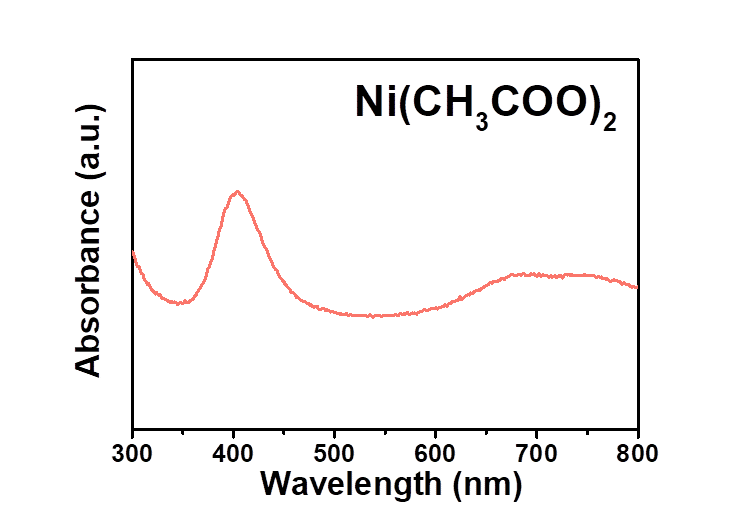


**Supplementary Fig. 4 UV-Vis spectrum**. UV-Vis spectrum of nickel acetate tetrahydrate in dimethyl formamide.


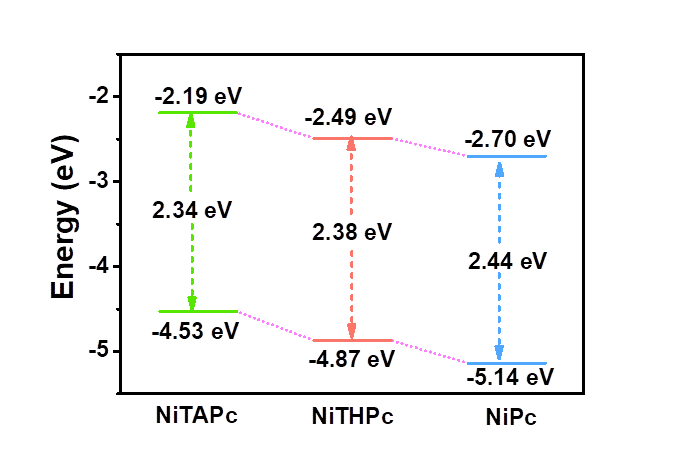


**Supplementary Fig. 5 Molecule orbitals**.The HOMO and LUMO orbital energies of NiPc, NiTHPc and NiTAPc.


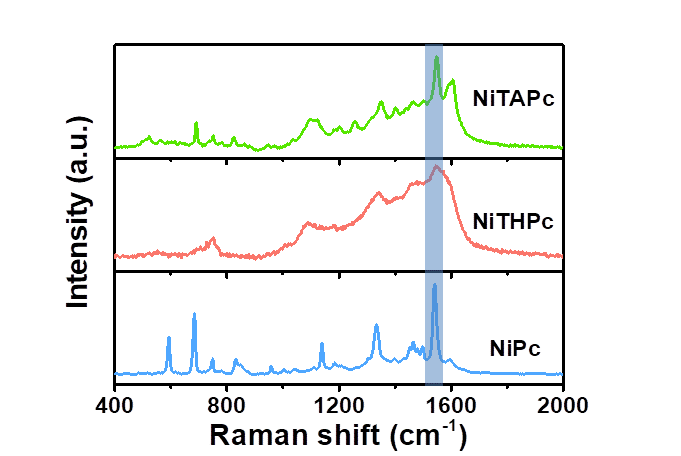


**Supplementary Fig. 6 Raman spectra.** Raman spectra of NiPc, NiTHPc and NiTAPc.


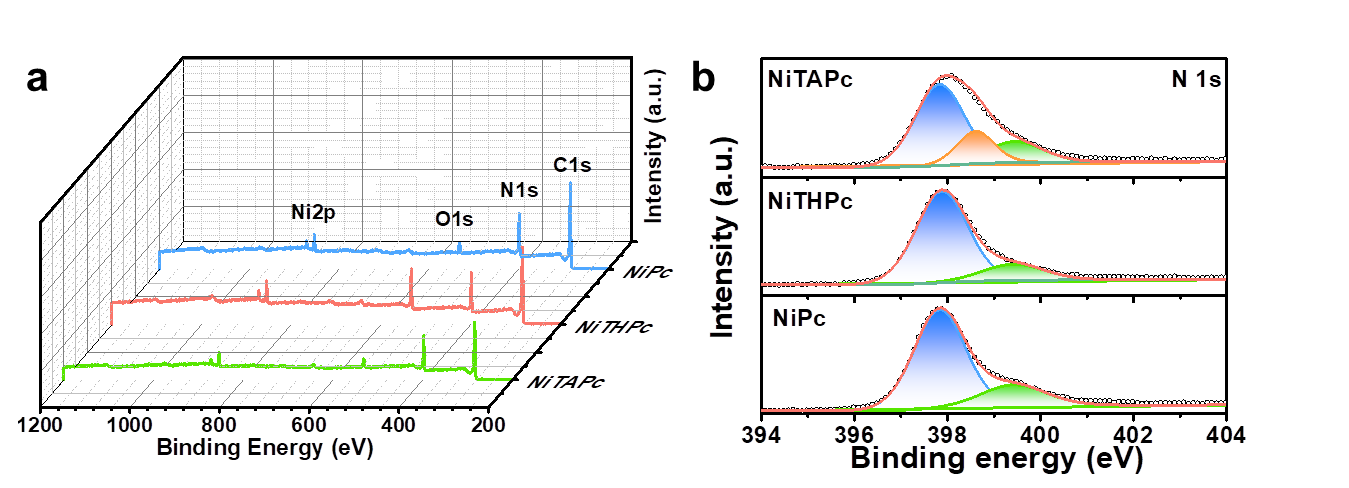


**Supplementary Fig. 7 XPS characterizations.** **a** XPS survey and **b** high-resolution XPS N 1s spectra of NiPc, NiTHPc and NiTAPc.


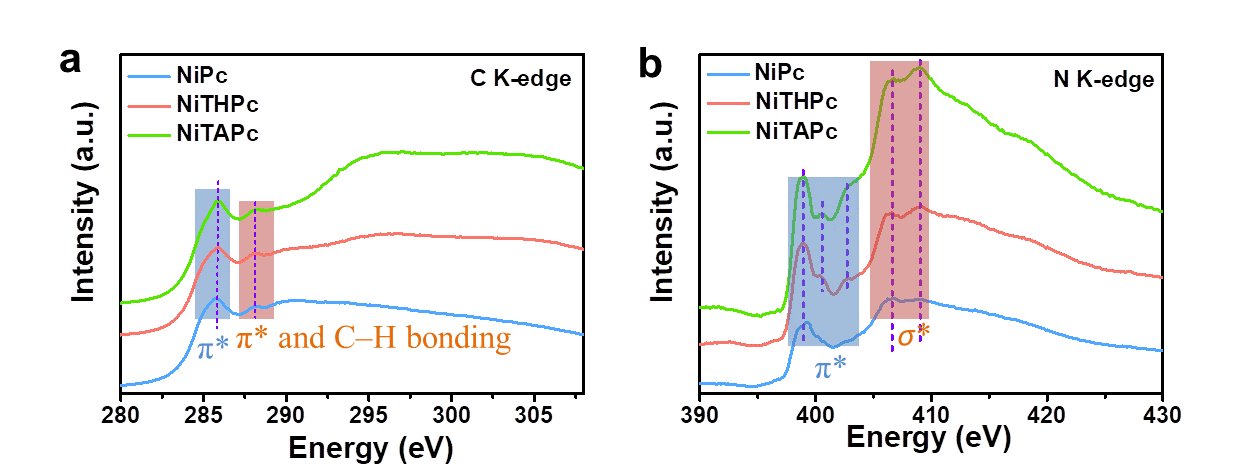


**Supplementary Fig. 8 XAS characterizations.** XAS spectra of **a** C and **b** N K-edge in NiPc, NiTHPc and NiTAPc.


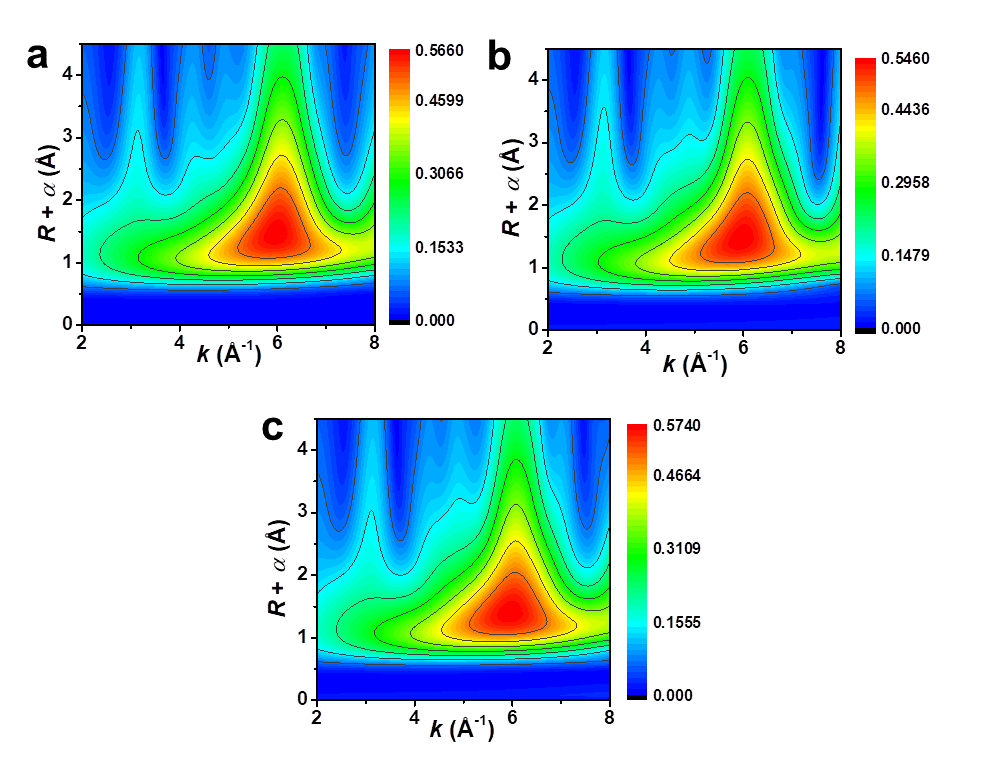


**Supplementary Fig. 9 The wavelet transform plot. a** NiPc, **b** NiTHPc and **c** NiTAPc.


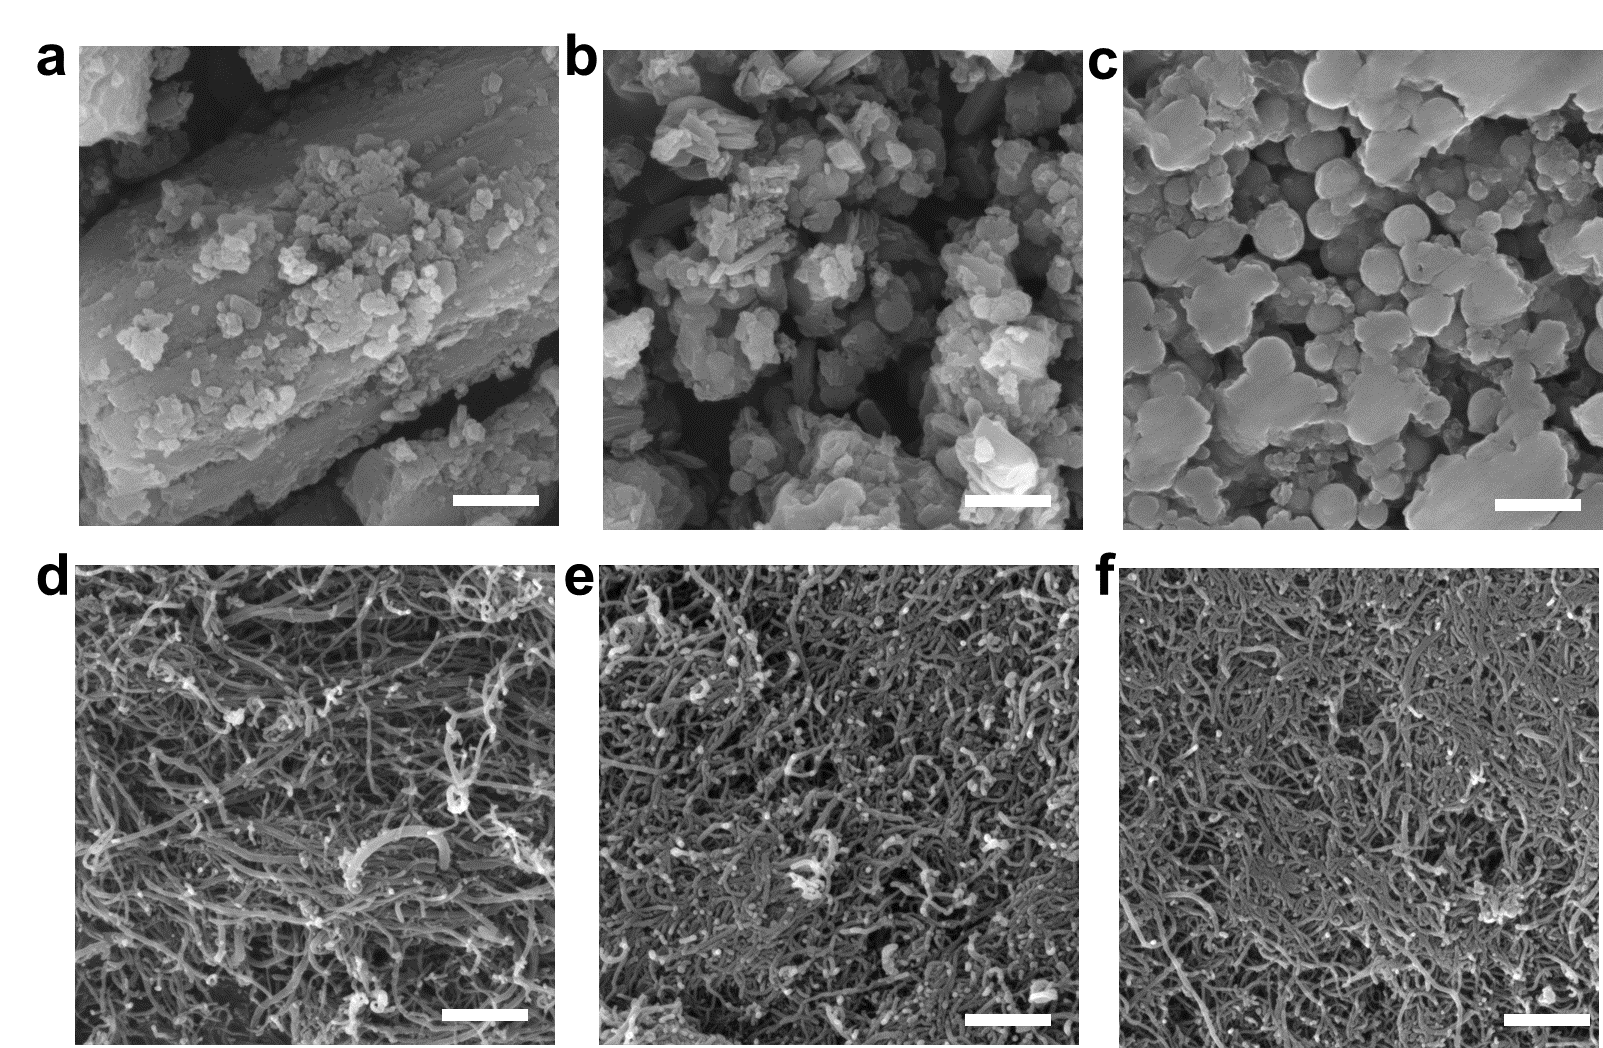


**Supplementary Fig. 10 SEM characterization.** SEM images of **a** NiPc, **b** NiTHPc, **c** NiTAPc, **d** NiPc/CNT, **e** NiTBPc/CNT, **f** NiTHPc/CNT and **g** NiTAPc/CNT. Scale bar, 1 µm.


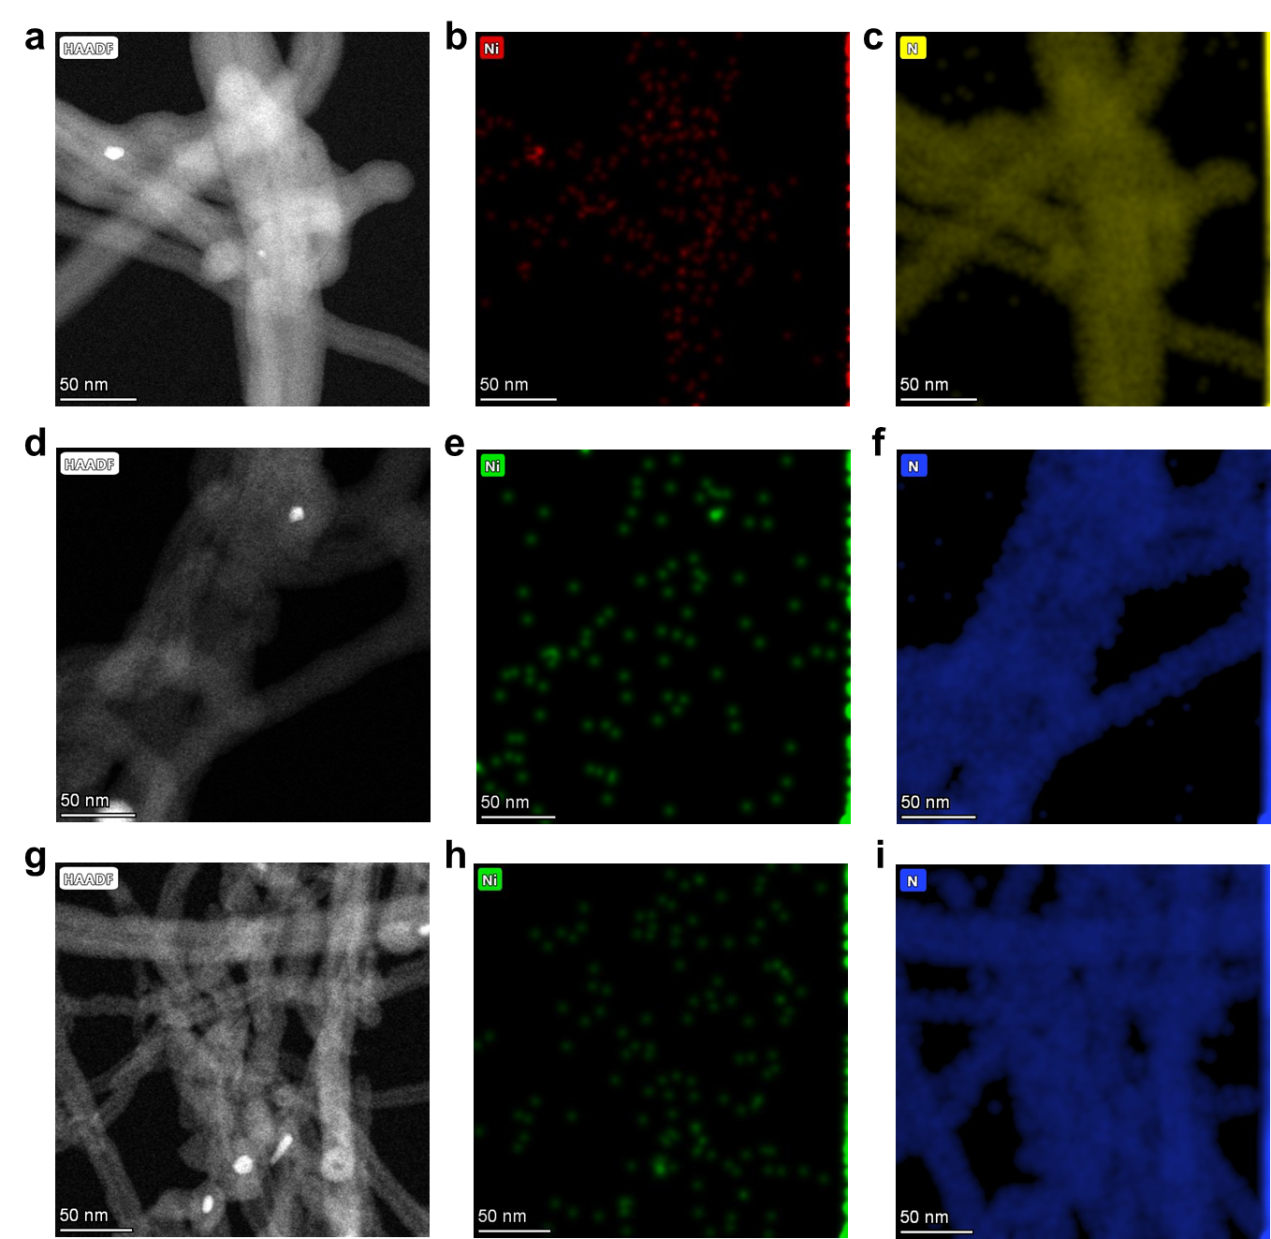


**Supplementary Fig. 11 HAADF-STEM characterization.** HAADF-STEMimages and corresponding EDX elemental mapping of Ni and N in **a**-**c** NiPc/CNT, **d**-**f** NiTHPc/CNT and **g**-**i** NiTAPc/CNT.


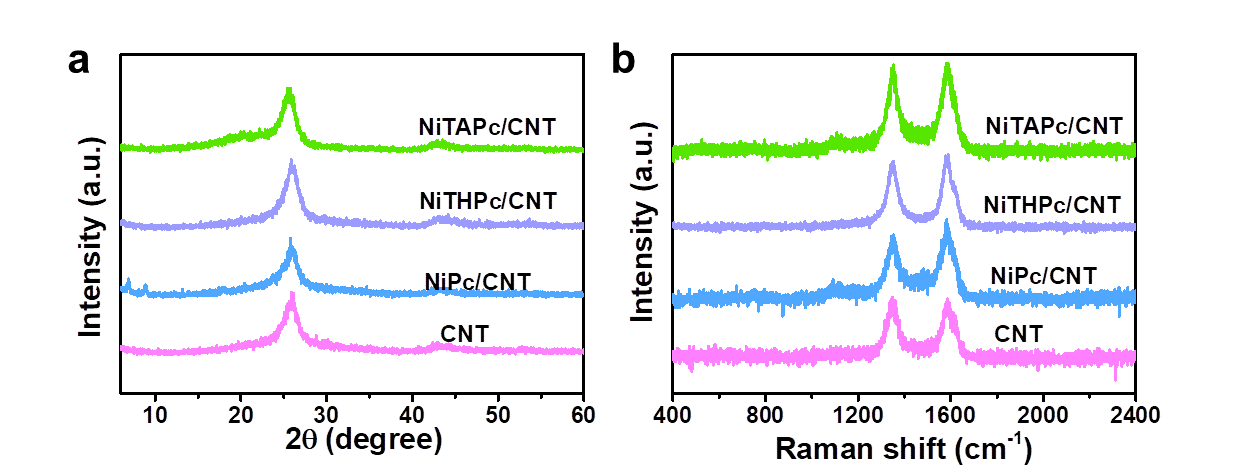


**Supplementary Fig. 12 Structure characterizations**. **a** XRD patterns and **b** Raman spectra of the pristine CNT, NiPc/CNT, NiTHPc/CNT and NiTAPc/CNT.


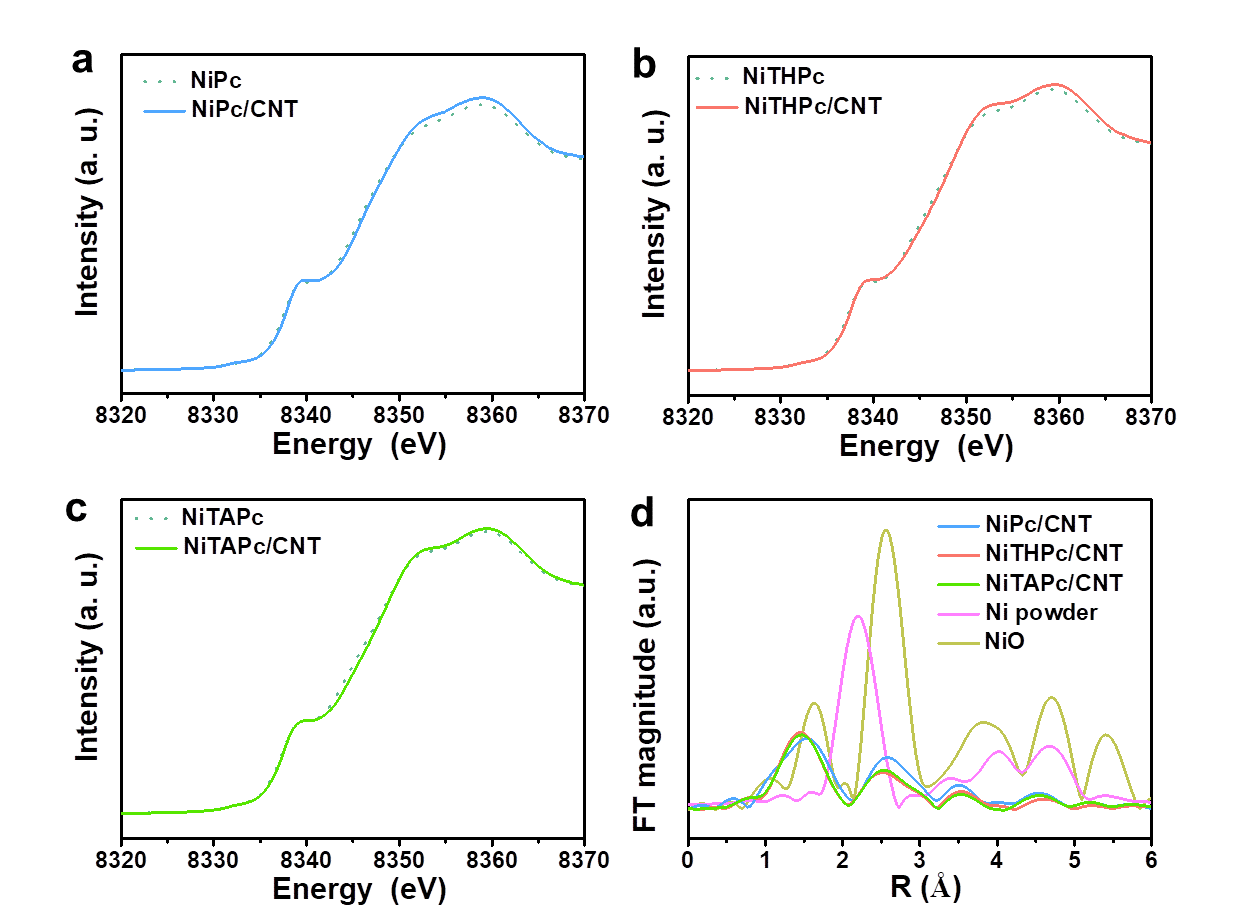


**Supplementary Fig. 13 X-ray absorption spectra**. **a** XANES spectra of Ni K-edge in NiPc and NiPc/CNT. **b** XANES spectra of Ni K-edge in NiTHPc and NiTHPc/CNT. **c** XANES spectra of Ni K-edge in NiTAPc and NiTAPc/CNT. **d** EXAFS spectra of Ni K-edge in NiO, Ni powder, NiPc/CNT, NiTHPc/CNT and NiTAPc/CNT.


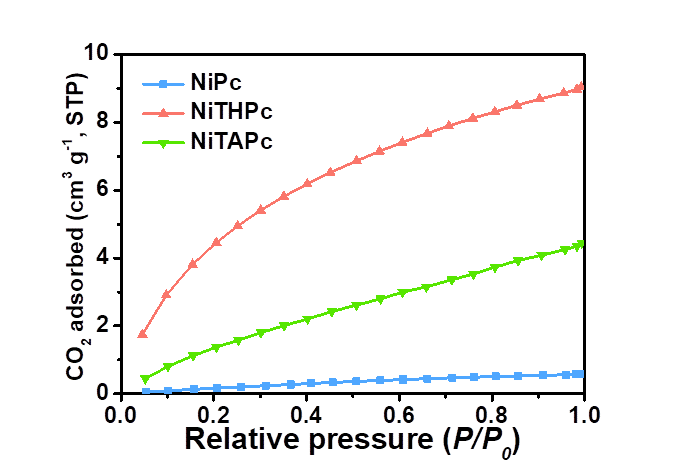


**Supplementary Fig. 14 CO2 adsorption**. The CO2 adsorption isotherms of NiPc, NiTHPc and NiTAPc.


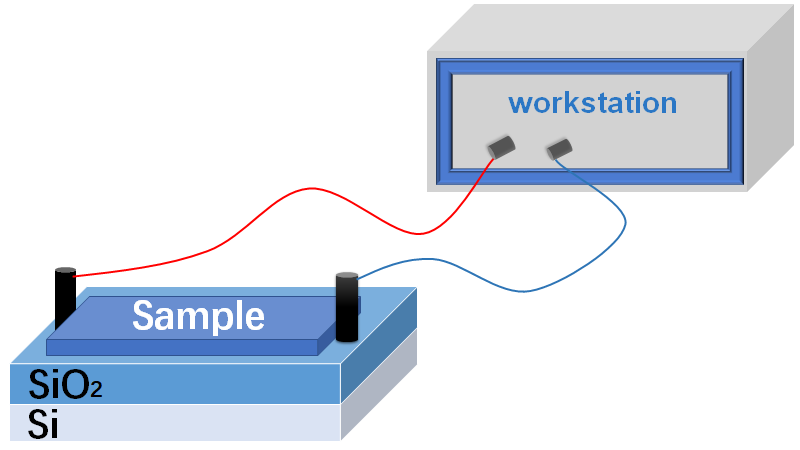


**Supplementary Fig. 15 Schematic illustration of the CO2 adsorption responses measurements.**


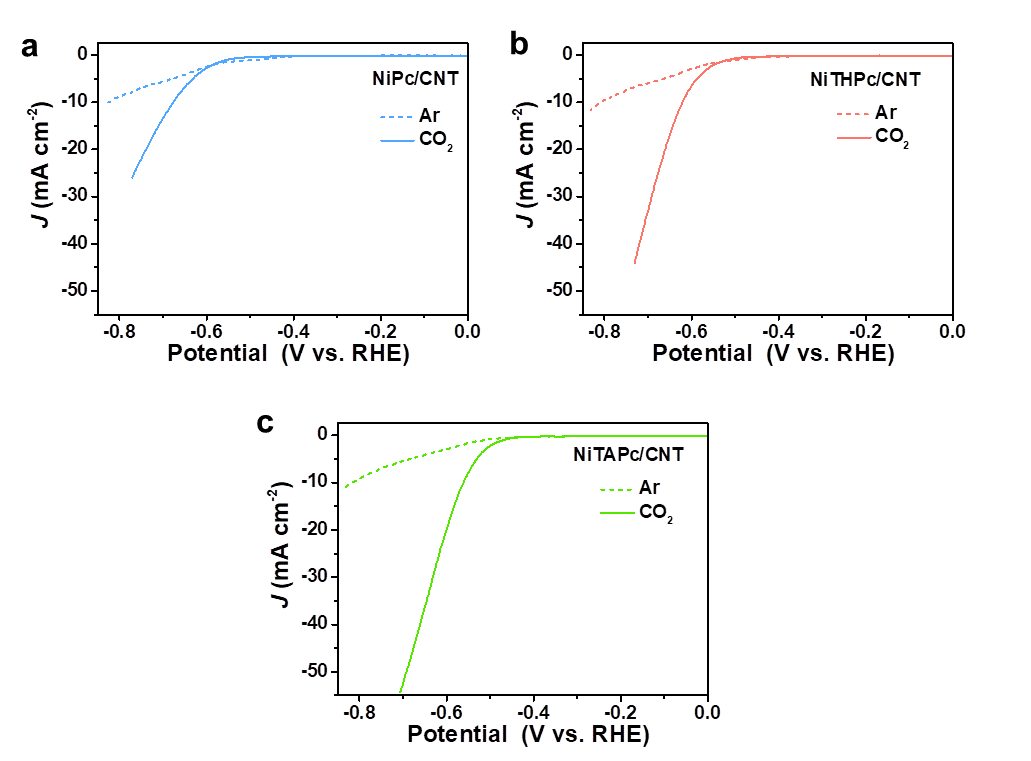


**Supplementary Fig. 16 LSV curves**. LSV curves of catalysts in the CO2 and Ar-saturated 0.5 M KHCO3 electrolyte.


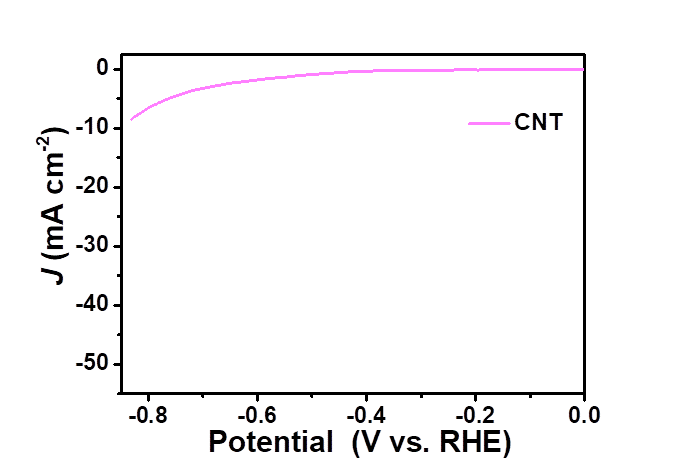


**Supplementary Fig. 17 LSV curve**. LSV curve of blank carbon nanotube in the CO2-saturated 0.5 M KHCO3 electrolyte.


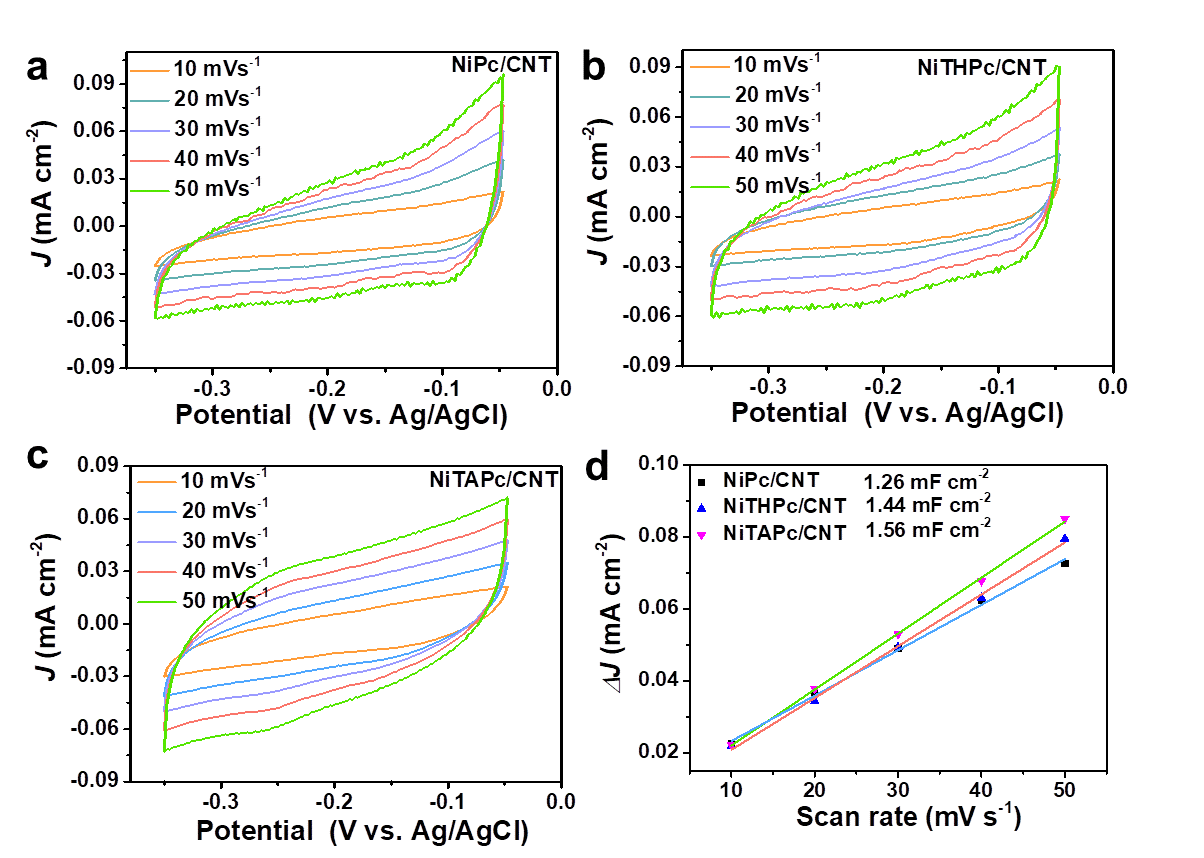


**Supplementary Fig. 18 ECSA measurements. a** CV profiles ofNiPc/CNT, **b** NiTHPc/CNT and **c** NiTAPc/CNT in Ar-saturated 0.5 M KHCO3 electrolyte. **d** Electrochemical double layer capacitance of NiPc/CNT, NiTHPc/CNT and NiTAPc/CNT.


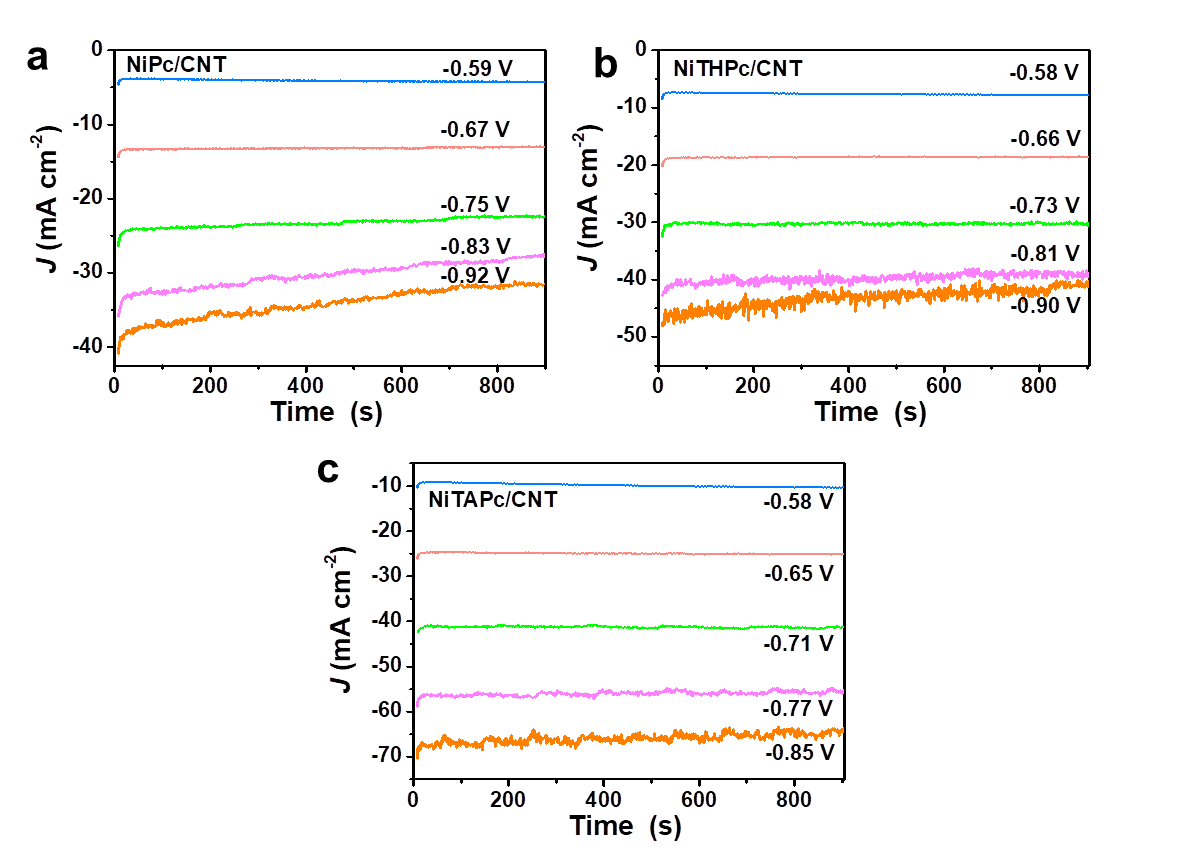


**Supplementary Fig. 19 I-T curves.** Chronoamperometry of **a** NiPc/CNT, **b** NiTHPc/CNT and **c** NiTAPc/CNT at different potentials in CO2-saturated 0.5 M KHCO3 electrolyte.


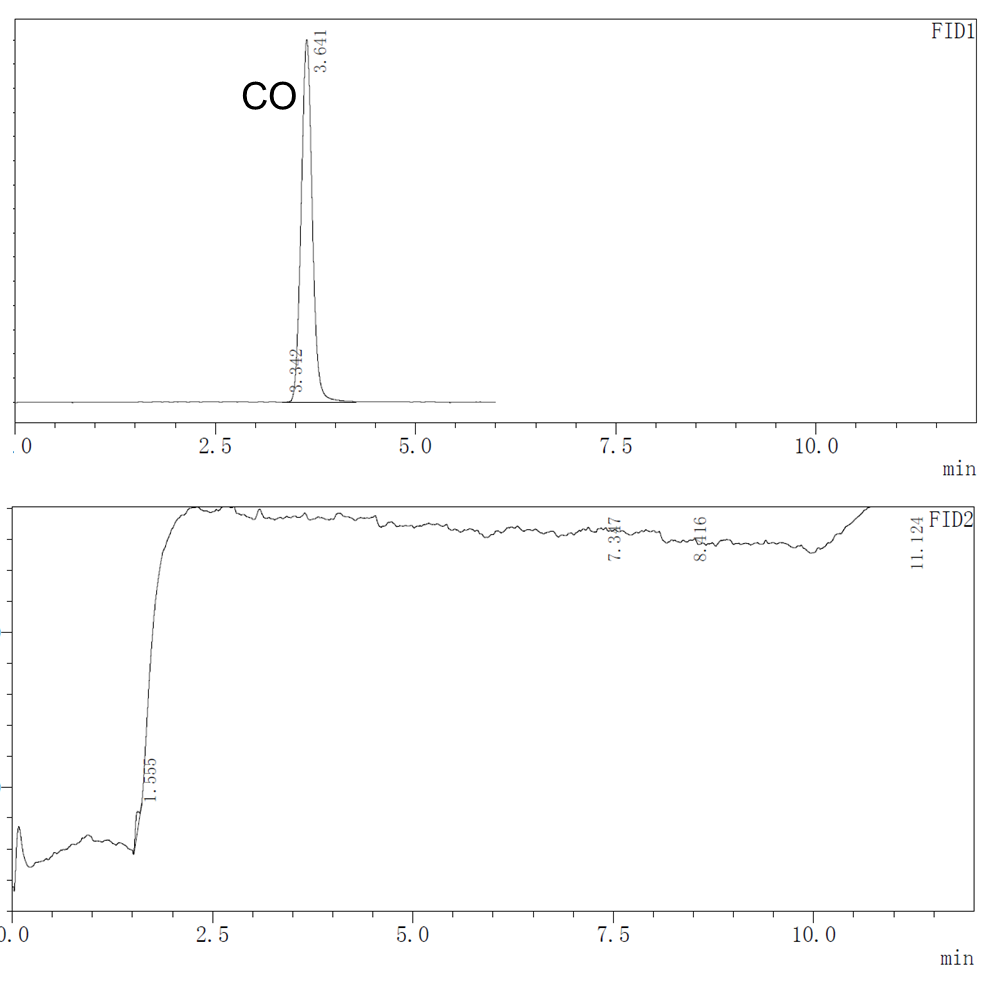


**Supplementary Fig. 20 The GC traces of gaseous products of NiTAPc/CNT from flame ionization detector (FID) channel.**


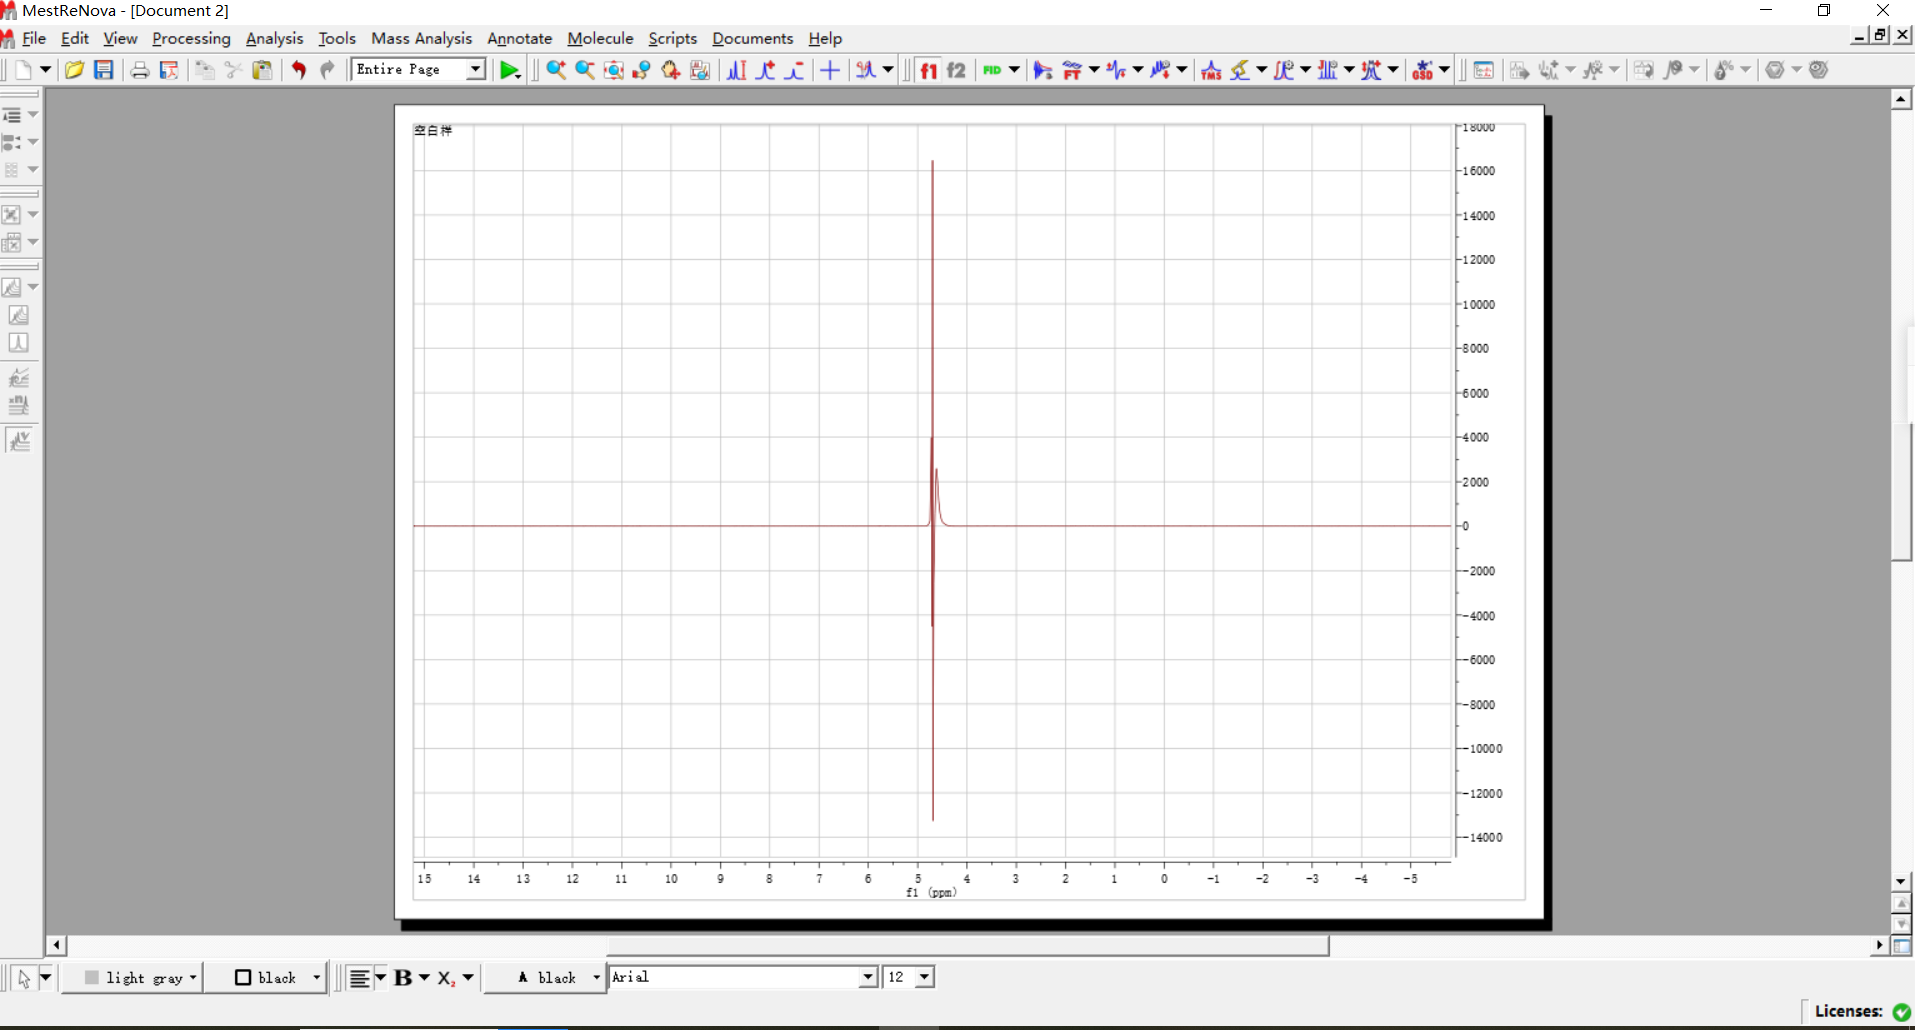


**Supplementary Fig. 21 1HNMR spectrum.** 1HNMR spectrum of the electrolyte of NiTAPc/CNT after 2 h electrochemical CO2RR in H-cell.


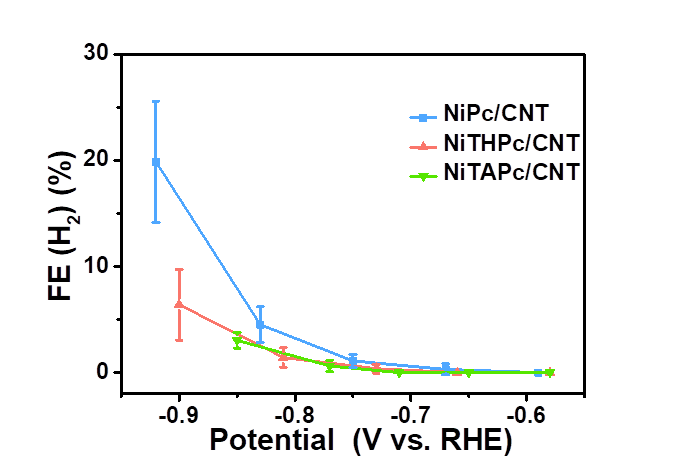


**Supplementary Fig. 22 FE(H2)**. FE(H2)of catalysts at different applied potential.

**
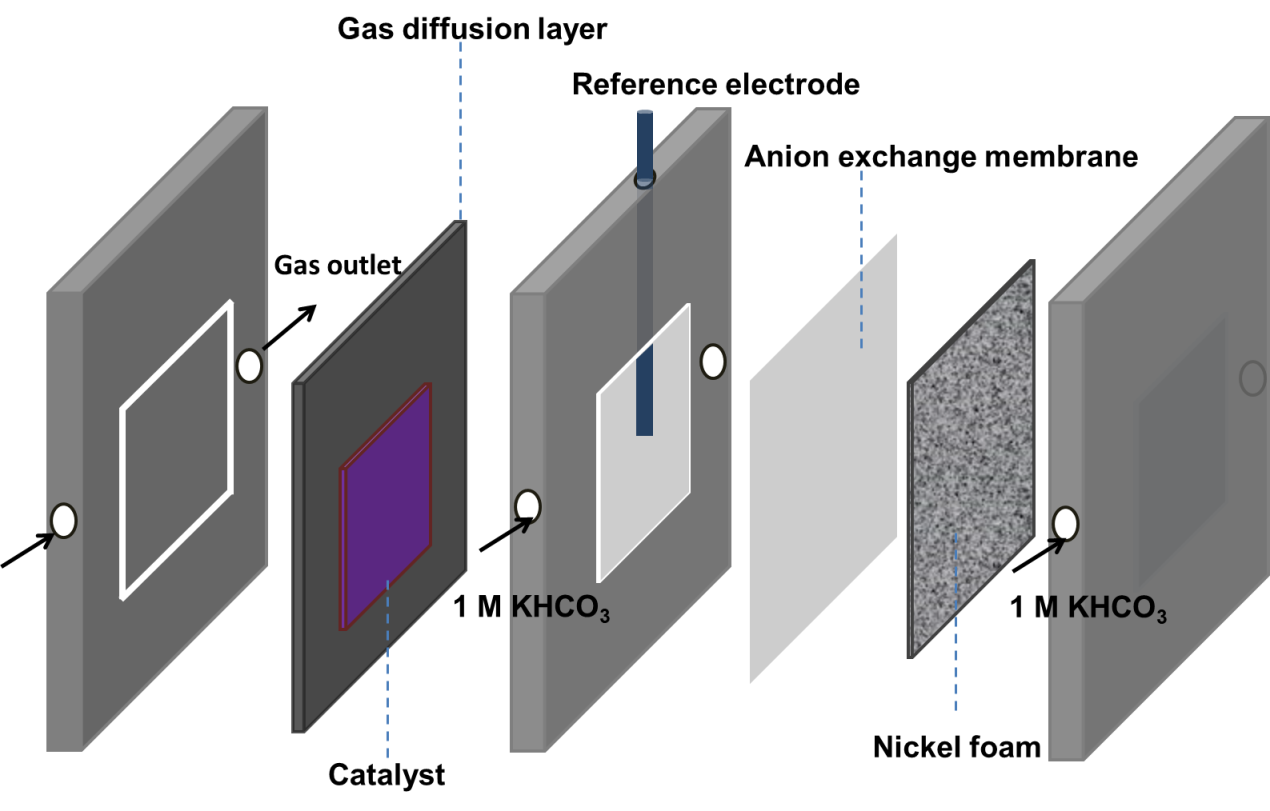
**

**Supplementary Fig. 23 Schematic** **illustration of flow cell for CO2RR.**

**
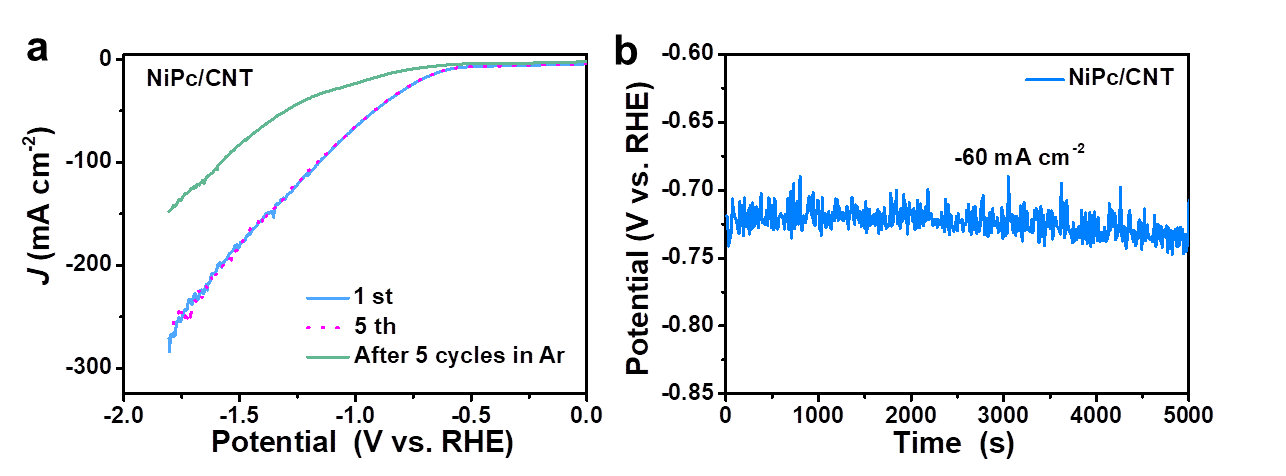
**

**Supplementary Fig. 24 Electrochemistry tests of NiPc/CNT.** **a** The LSV of catalyst without *iR* corrections in CO2 including the pristine of NiPc/CNT and the NiPc/CNT after the LSV measurement for 5 times in the Ar atmosphere. **b** The NiPc/CNT for CO2RR electrolysis at the current density of −60 mA cm-2.

**
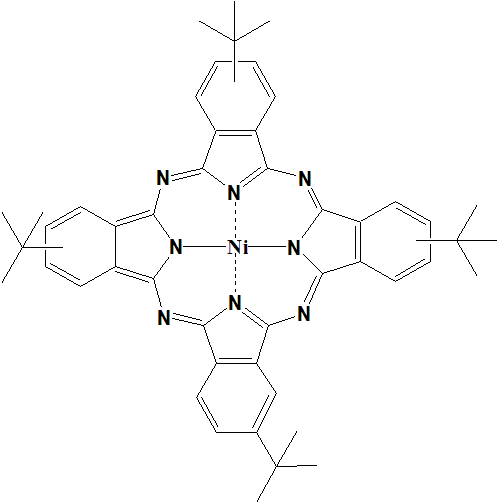
**

**Supplementary Fig. 25 Molecular structure**. Molecular formula of NiTBPc.

**
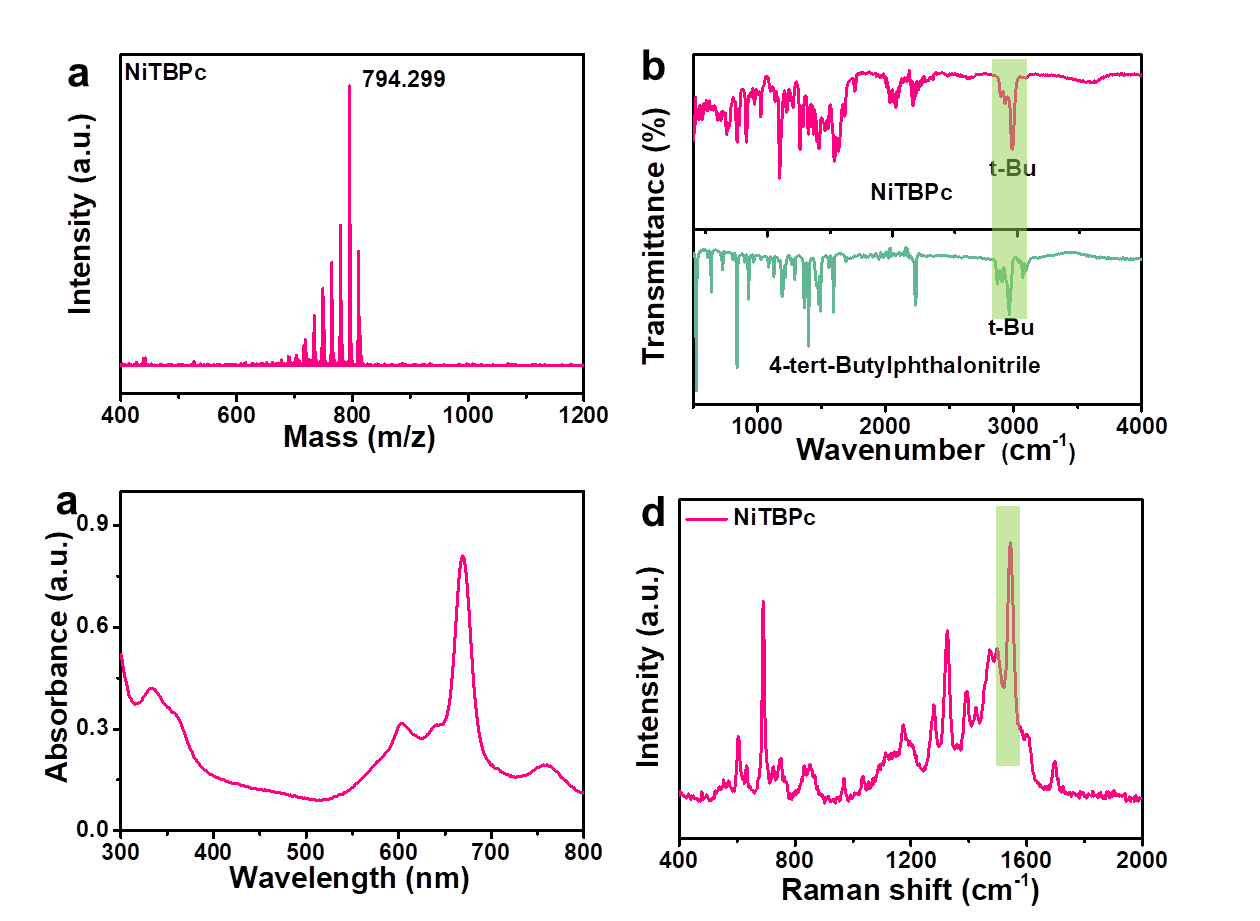
**

**Supplementary Fig. 26 Structure characterization of NiTBPc**. **a** MALDI-TOF MS spectrum. **b** FTIR spectra. **c** UV-Vis spectrum in dimethyl formamide. **d** Raman spectrum.


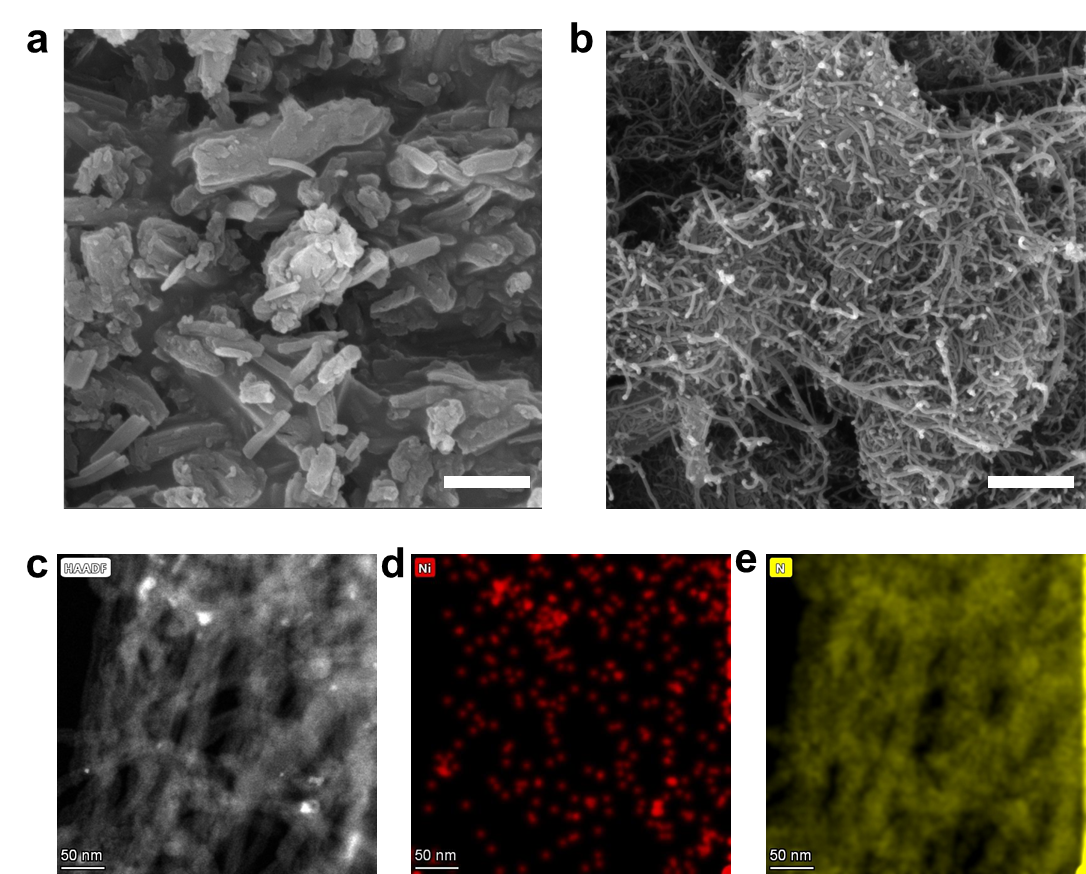


**Supplementary Fig. 27 SEM and HAADF-STEM characterizations.** SEM images of **a** NiTBPc and **b** NiTBPc/CNT, Scale bar, 1 µm. **c**-**e** HAADF-STEMimages and corresponding EDX elemental mapping of Ni and N in NiTBPc/CNT.


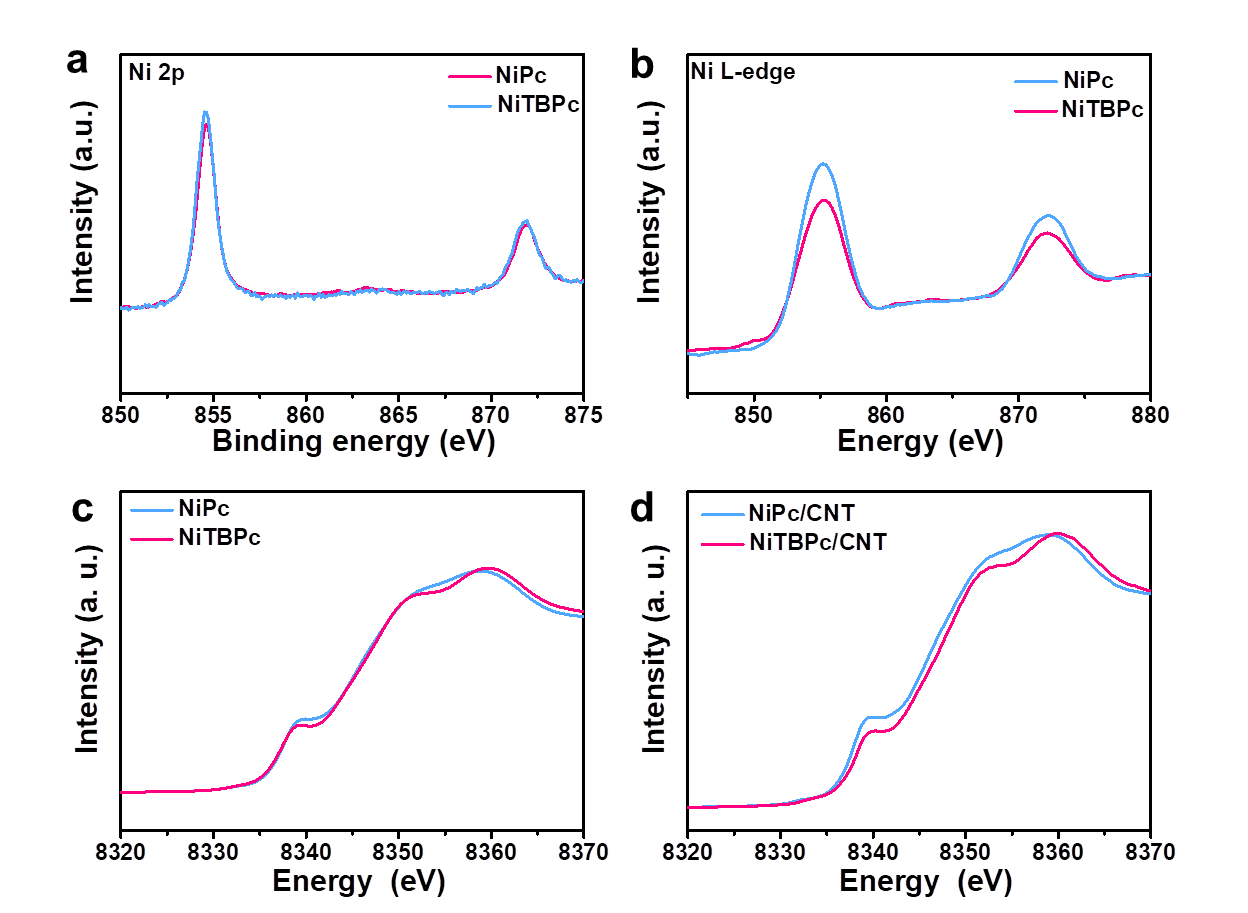


**Supplementary Fig. 28 Electronic density characterizations**. **a** High-resolution XPS Ni 2p spectra of NiPc and NiTBPc. **b** XAS spectra of Ni L-edge NiPc and NiTBPc. **c** XANES spectra of Ni K-edge from NiPc and NiTBPc. **d** XANES spectra of Ni K-edge from NiPc/CNT and NiTBPc/CNT.


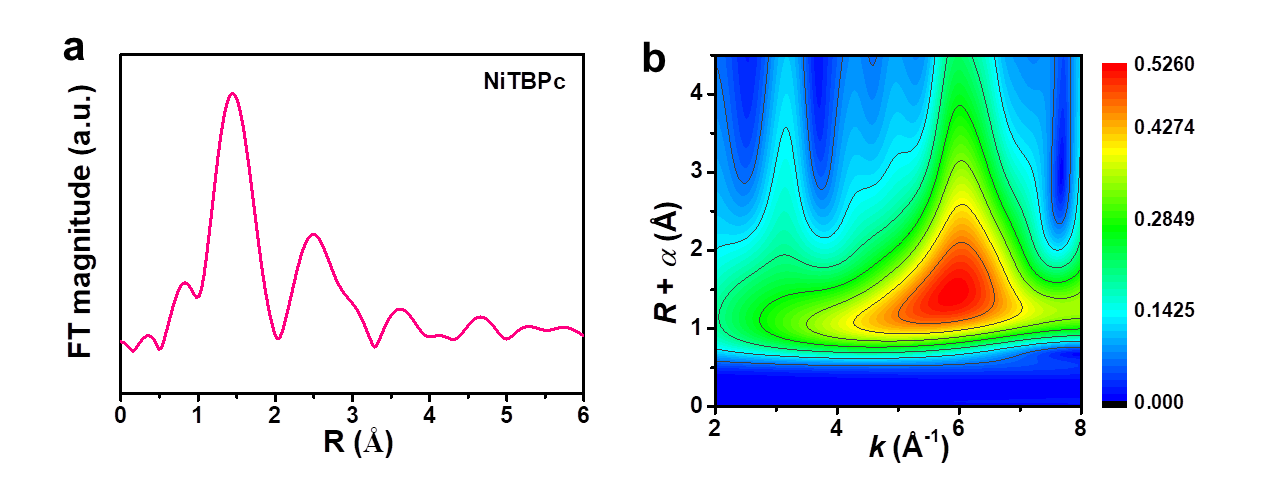


**Supplementary Fig. 29 X-ray absorption spectra**. **a** EXAFS spectrum of Ni K-edge from NiTBPc. **b** The wavelet transform plot of NiTBPc,


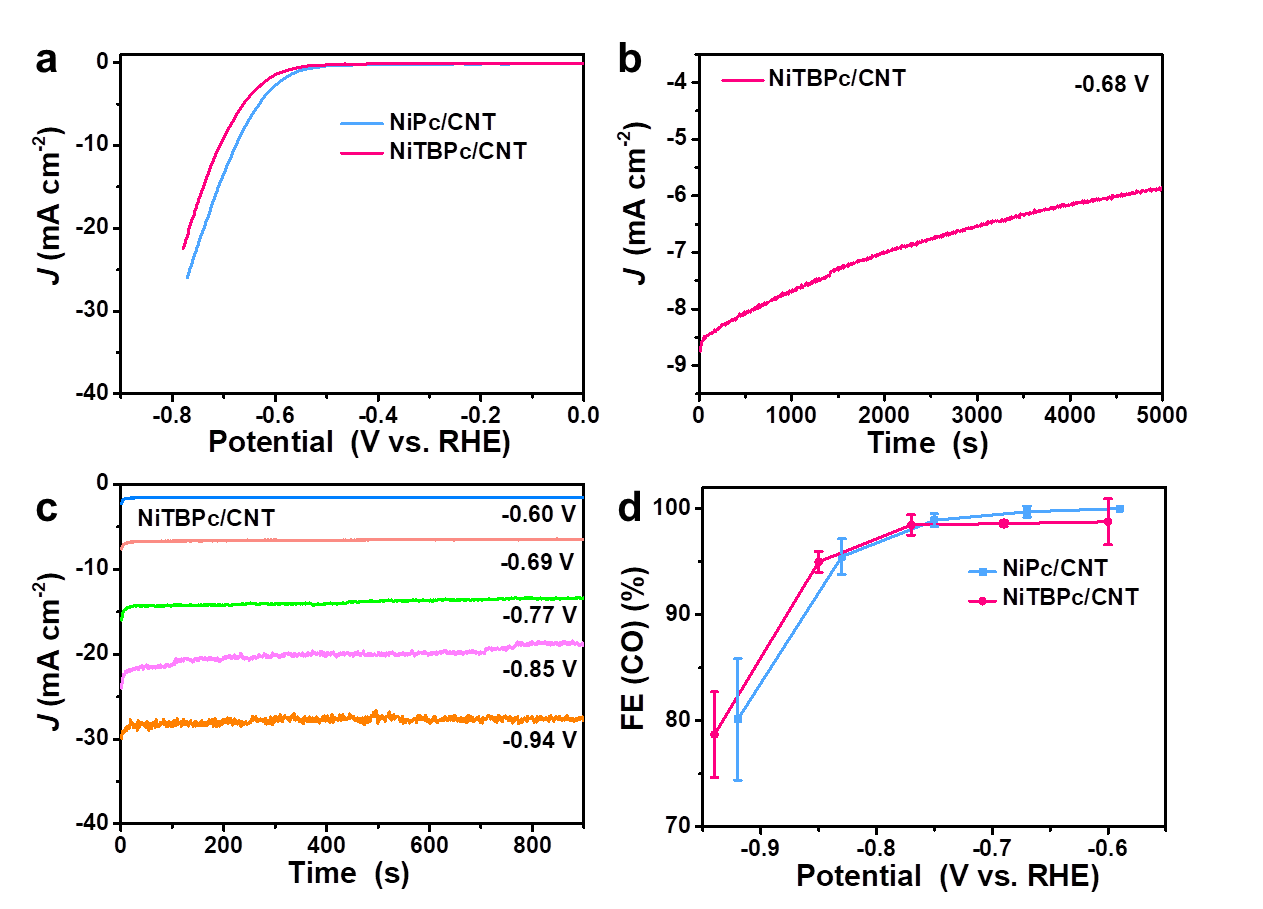


**Supplementary Fig. 30 CO2RR performance of NiTBPc in H-cell. a** LSV profile in 0.5 M CO2-saturated KHCO3 electrolyte. **b** Chronoamperometry of NiTBPc/CNT at −0.68 V. **c** Chronoamperometry of NiTBPc/CNT at different potentials in CO2-saturated 0.5 M KHCO3 electrolyte. **d** FE(CO)s of NiTBPc/CNT at the according potentials.


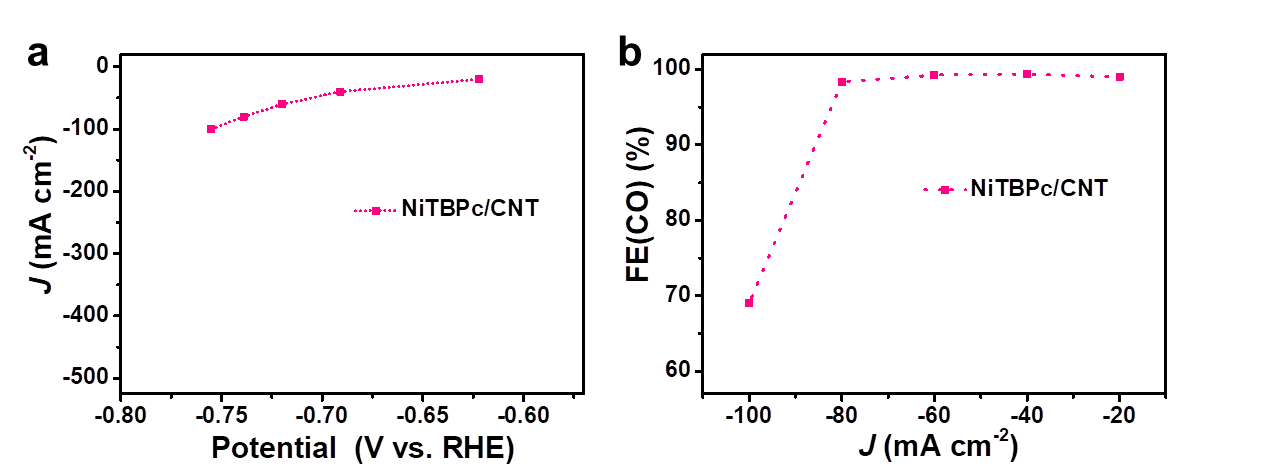


**Supplementary Fig. 31 CO2RR performance of NiTBPc in flow cell**. Current densities of NiTBPc/CNT at different potentials in 1 M KHCO3 electrolyte. **b** FE(CO) of NiTBPc/CNT.

**Supplementary Tables**

**Supplementary Table 1. The surface area of as-prepared molecule catalysts from the N2 adsorption/desorption analysis**

| Samples | Surface area (m2 g-1) |
| --- | --- |
| NiPc | 74.681 |
| NiTHPc | 9.235 |
| NiTAPc | 3.138 |

**·`**

**Supplementary Table 2**. **Comparison of CO2RR performance between the prepared catalysts and the reported noble-metal-free catalysts for conversion CO2 into CO in H-cell with 0.5 M KHCO3 electrolyte.**

| Catalysts | E vs. RHE (V) | *J* (mA cm-2) | FE(CO) | Reference |
| --- | --- | --- | --- | --- |
| NiTAPc/CNT | -0.58 | 12.2 | Almost 100% | This work |
| NiTHPc/CNT | -0.61 | 11.0 | Almost 100% |
| NiPc/CNT | -0.68 | 8.2 | 99.6% |
| NiPc-OMe-MDE | -0.64 | 14.5 | Almost 100% | 1 |
| Co−N5/HNPCSs | -0.73 | 6.2 | 99.2% | 2 |
| A-Ni-NSG | -0.72 | 22 | 98% | 3 |
| Ni-CNT-CC | -0.71 | 32.3 | 99% | 4 |
| NiI-NCNT@Ni9Cu | -0.73 | 32.87 | 97% | 5 |
| Ni-NCB | -0.66 | 23 | 95% | 6 |
| Co(II)CPY/CNT | -0.70 | 10.73 | 96% | 7 |
| CoPc2@MWCNTS | -0.676 | 18.1 | 93% | 8 |

**Supplementary Table 3 Comparison of CO2RR performance between the prepared catalysts and the reported catalysts with gas-diffusion electrodes.**

| Catalysts | Electrolyte | *J* (mA cm-2) | FE(CO) | Reference |
| --- | --- | --- | --- | --- |
| NiTAPc/CNT | 1 M KHCO3 | 150 | 99.9% | This work |
| 1 M KHCO3 | 500 | 94.6% |
| NiPc-OMe-MDE | 1 M KHCO3 | 150 | 99.6% | 1 |
| CoPc2@MWCNTS | 1 M KOH | 116 | ~96% | 8 |
| Fe3+-N-C | 0.5 M KHCO3 | ~50 | ~90% | 9 |
| CoPc+phenol | 1 M KOH | 200 | ~88% | 10 |
| CoPc©Fe-N-C | 0.5 M KOH | 275.6 | ~90% | 11 |
| Ni-N-C | 1 M KHCO3 | ~200 | ~89% | 12 |

**Supplementary Table 4**. **The ICP-OES results of prepared molecular catalysts and carbon nanotubes.**

| Samples | Nickel content |
| --- | --- |
| NiPc/CNT | 0.4553 wt% |
| NiTHPc/CNT | 0.4234 wt% |
| NiTAPc/CNT | 0.3474 wt% |
| CNT | 0.0030 wt% |

**Supplementary Notes**

**Supplementary Note 1.** The XPS survey (Supplementary Fig. 4a) indicates the molecule catalysts comprised by the C, N and Ni. The NiTHPc has a pronounced O signal from the periphery substituent of hydroxyl. The high-resolution XPS of N 1s (Supplementary Fig. 4b) can be well deconvoluted with a Lorentzian-Gaussian fit into three peaks. The peaks at around 397.9 eV can be assigned to the pyridinic-N, and the peaks locates at 399.5 eV belongs to the pyrrolic-N of Ni–N. In addition, the binding energy of N from the NH2 falls in between that of pyridinic-N and pyrrolic-N at 398.5 eV.13 On the basis of these results, the amino and hydroxyl are successfully substituted in NiTAPc and NiTHPc, respectively.

**Supplementary Note 2.** Supplementary Fig. 8a presents the C K-edge XANES spectra of the three investigated NiPc in this work. The prominent peaks of NiPc-base molecules at about 285.8 eV can be assigned to π* excitation of C–C bonds in the phthalocyanines ring,14 and the modern intensity peaks located at 288.1 eV can be attributed to C–H bonding and π* states.15 Supplementary Fig. 8b display the N K-edge XANES spectra of samples. The absorption edge among 397 and 403 eV is indexed to the π* resonance, and the absorption peaks at about 406.6 and 409 eV are belonged to *σ** features.15 The electron-donating substituents of amino and hydroxyl have great influence on the electronic structure of N to further tune the electron density catalytic site of Ni.

**Supplementary References**

1. Zhang, X.*, et al.* Molecular engineering of dispersed nickel phthalocyanines on carbon nanotubes for selective CO2 reduction. *Nat. Energy* 5, 684-692 (2020).

2. Pan, Y.*, et al.* Design of single-atom Co–N5 catalytic site: a robust electrocatalyst for CO2 reduction with nearly 100% CO selectivity and remarkable stability. *J. Am. Chem. Soc.* 140, 4218-4221 (2018).

3. Yang, H.B.*, et al.* Atomically dispersed Ni (I) as the active site for electrochemical CO2 reduction. *Nat. Energy* 3, 140-147 (2018).

4. Liu, S.*, et al.* Elucidating the Electrocatalytic CO2 Reduction Reaction over a Model Single‐Atom Nickel Catalyst. *Angew. Chem. Int. Ed.* 59, 798-803 (2020).

5. Zhang, T.*, et al.* Atomically Dispersed Nickel(I) on an Alloy-Encapsulated Nitrogen-Doped Carbon Nanotube Array for High-Performance Electrochemical CO2 Reduction Reaction. *Angew. Chem. Int. Ed.* 59, 12055-12061 (2020).

6. Zheng, T.*, et al.* Large-scale and highly selective CO2 electrocatalytic reduction on nickel single-atom catalyst. *Joule* 3, 265-278 (2019).

7. Sun, L.*, et al.* A Planar, Conjugated N4‐Macrocyclic Cobalt Complex for Heterogeneous Electrocatalytic CO2 Reduction with High Activity. *Angew. Chem.* 132, 17252-17257 (2020).

8. Wang, M.*, et al.* CO2 electrochemical catalytic reduction with a highly active cobalt phthalocyanine. *Nat. Commun.* 10, 1-8 (2019).

9. Gu, J., Hsu, C.-S., Bai, L., Chen, H.M. & Hu, X. Atomically dispersed Fe3+ sites catalyze efficient CO2 electroreduction to CO. *Science* 364, 1091-1094 (2019).

10. Ren, S.*, et al.* Molecular electrocatalysts can mediate fast, selective CO2 reduction in a flow cell. *Science* 365, 367-369 (2019).

11. Lin, L.*, et al.* Synergistic Catalysis over Iron-Nitrogen Sites Anchored with Cobalt Phthalocyanine for Efficient CO2 Electroreduction. *Adv. Mater.* 31, 1903470 (2019).

12. Möller, T.*, et al.* Efficient CO2 to CO electrolysis on solid Ni–N–C catalysts at industrial current densities. *Energy Environ. Sci.* 12, 640-647 (2019).

13. Fu, J.*, et al.* Graphitic carbon nitride with dopant induced charge localization for enhanced photoreduction of CO2 to CH4. *Adv. Sci.* 6, 1900796 (2019).

14. Zhong, J.*, et al.* Probing solid state N-doping in graphene by X-ray absorption near-edge structure spectroscopy. *Carbon* 50, 335-338 (2012).

15. Willey, T.M.*, et al.* Electronic structure differences between H2-, Fe-, Co-, and Cu-phthalocyanine highly oriented thin films observed using NEXAFS spectroscopy. *J. Chem. Phys.* 139, 034701 (2013).
